# Supplementary material
Source: Springer Nature journal article supplement (https://www.springermedizin.de/resource/supplementary/12943_2008_364_MOESM2_ESM.pdf/9554022)

|                       |   |   |   |   |
|-----------------------|---|---|---|---|
| Extract               | - | + | + | + |
| Wt TBE                | + | + | + | + |
| Unlabelled Wt TBE     | - | - | + | - |
| Unlabelled Mutant TBE | - | - | - | + |

|              |   |   |   |
|--------------|---|---|---|
| $\beta$ -cat | - | + | - |
| Rac1         | - | - | + |
| IgG          | + | - | - |

TCF-4/ $\beta$ -catenin/Rac1 →

Free Probe →

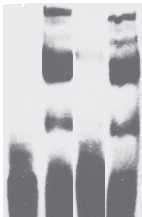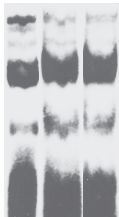

Supplement: MOESM2 [file 9554022]
